# Supplementary material for: Switching between reading tasks leads to phase-transitions in reading times in L1 and L2 readers
Source: PLoS One. 2019 Feb 5;14(2):e0211502. doi: 10.1371/journal.pone.0211502 (PMC6363172; doi:10.1371/journal.pone.0211502)
Supplement: S4 File — (CSV) [file pone.0211502.s004.csv]

1	1	1	1	0.38297	-1	-1
1	1	1	2	0.39095	-1	-1
1	1	1	3	0.65398	-1	-1
1	1	1	4	0.47936	-1	-1
1	1	1	5	0.36736	-1	-1
1	1	1	6	0.38214	-1	-1
1	1	1	7	0.39945	-1	-1
1	1	1	8	0.59081	-1	-1
1	1	1	9	0.38265	-1	-1
1	1	1	10	0.79132	-1	-1
1	1	1	11	0.46237	-1	-1
1	1	1	12	0.431	-1	-1
1	1	1	13	0.66345	-1	-1
1	1	1	14	0.73453	-1	-1
1	1	1	15	0.37554	-1	-1
1	1	1	16	0.59812	-1	-1
1	1	1	17	0.41563	-1	-1
1	1	1	18	0.51826	-1	-1
1	1	1	19	0.46311	-1	-1
1	1	1	20	1.7106	-1	-1
1	1	1	21	0.43968	-1	-1
1	1	1	22	0.39024	-1	-1
1	1	1	23	0.57503	-1	-1
1	1	1	24	0.43952	-1	-1
1	1	1	25	0.41484	-1	-1
1	1	1	26	0.375	-1	-1
1	1	1	27	0.31843	-1	-1
1	1	1	28	1.2951	-1	-1
1	1	1	29	0.79084	-1	-1
1	1	1	30	0.66265	-1	-1
1	1	1	31	0.71104	-1	-1
1	1	1	32	0.57513	-1	-1
1	1	1	33	0.45508	-1	-1
1	1	1	34	0.41514	-1	-1
1	1	1	35	0.51854	-1	-1
1	1	1	36	0.46317	-1	-1
1	1	1	37	0.39056	-1	-1
1	1	1	38	0.37504	-1	-1
1	1	1	39	0.40673	-1	-1
1	1	1	40	0.4714	-1	-1
1	1	1	41	0.34242	-1	-1
1	1	1	42	0.40734	-1	-1
1	1	1	43	0.87852	-1	-1
1	1	1	44	0.42326	-1	-1
1	1	1	45	0.5345	-1	-1
1	1	1	46	0.43134	-1	-1
1	1	1	47	0.49473	-1	-1
1	1	1	48	0.80711	-1	-1
1	1	1	49	0.43102	-1	-1
1	1	1	50	0.43874	-1	-1
1	1	1	51	0.49531	-1	-1
1	1	1	52	0.37462	-1	-1
1	1	1	53	0.41455	-1	-1
1	1	1	54	0.38331	-1	-1
1	1	1	55	0.48677	-1	-1
1	1	1	56	0.62255	-1	-1
1	1	1	57	0.47093	-1	-1
1	1	1	58	0.42354	-1	-1
1	1	1	59	0.4065	-1	-1
1	1	1	60	0.50338	-1	-1
1	1	1	61	0.43873	-1	-1
1	1	1	62	2.3354	-1	-1
1	1	1	63	0.81388	-1	-1
1	1	1	64	0.47154	-1	-1
1	1	1	65	0.50233	-1	-1
1	1	1	66	0.61565	-1	-1
1	1	1	67	0.63091	-1	-1
1	1	1	68	0.57469	-1	-1
1	1	1	69	0.99855	-1	-1
1	1	1	70	0.60735	-1	-1
1	1	1	71	2.2386	-1	-1
1	1	1	72	0.41559	-1	-1
1	1	1	73	0.47823	-1	-1
1	1	1	74	0.35096	-1	-1
1	1	1	75	0.37493	-1	-1
1	1	1	76	0.48694	-1	-1
1	1	1	77	0.49504	-1	-1
1	1	1	78	0.37483	-1	-1
1	1	1	79	0.40687	-1	-1
1	1	1	80	0.68679	-1	-1
1	1	1	81	0.39913	-1	-1
1	1	1	82	0.42277	-1	-1
1	1	1	83	0.43927	-1	-1
1	1	1	84	0.40729	-1	-1
1	1	1	85	0.41419	-1	-1
1	1	1	86	0.38344	-1	-1
1	1	1	87	0.41471	-1	-1
1	1	1	88	0.51145	-1	-1
1	1	1	89	0.63071	-1	-1
1	1	1	90	0.41475	-1	-1
1	1	1	91	0.41453	-1	-1
1	1	1	92	0.39885	-1	-1
1	1	1	93	0.44771	-1	-1
1	1	1	94	0.43022	-1	-1
1	1	1	95	0.39885	-1	-1
1	1	1	96	0.36774	-1	-1
1	1	1	97	0.42272	-1	-1
1	1	1	98	0.37509	-1	-1
1	1	1	99	0.3904	-1	-1
1	1	1	100	0.46368	-1	-1
1	1	1	101	0.44632	-1	-1
1	1	1	102	0.46288	-1	-1
1	1	1	103	0.71099	-1	-1
1	1	1	104	0.38258	-1	-1
1	1	1	105	0.35881	-1	-1
1	1	1	106	0.59103	-1	-1
1	1	1	107	0.35896	-1	-1
1	1	1	108	0.35162	-1	-1
1	1	1	109	0.35849	-1	-1
1	1	1	110	0.52661	-1	-1
1	1	1	111	0.47121	-1	-1
1	1	1	112	0.3986	-1	-1
1	1	1	113	1.0551	-1	-1
1	1	1	114	0.51961	-1	-1
1	1	1	115	0.958	-1	-1
1	1	1	116	0.35166	-1	-1
1	1	1	117	0.31099	-1	-1
1	1	1	118	0.55035	-1	-1
1	1	1	119	0.35963	-1	-1
1	1	1	120	0.39031	-1	-1
1	1	1	121	0.32724	-1	-1
1	1	1	122	0.41536	-1	-1
1	1	1	123	0.44594	-1	-1
1	1	1	124	0.53535	-1	-1
1	1	1	125	0.40679	-1	-1
1	1	1	126	0.32682	-1	-1
1	1	1	127	0.3838	-1	-1
1	1	1	128	0.31061	-1	-1
1	1	1	129	0.39917	-1	-1
1	1	1	130	0.5025	-1	-1
1	1	1	131	0.3833	-1	-1
1	1	1	132	0.43809	-1	-1
1	1	1	133	0.53555	-1	-1
1	1	1	134	0.42317	-1	-1
1	1	1	135	0.42203	-1	-1
1	1	1	136	0.40751	-1	-1
1	1	1	137	0.39101	-1	-1
1	1	1	138	0.42289	-1	-1
1	1	1	139	0.50329	-1	-1
1	1	1	140	0.52608	-1	-1
1	1	1	141	0.68748	-1	-1
1	1	1	142	0.53469	-1	-1
1	1	1	143	0.39047	-1	-1
1	1	1	144	0.52745	-1	-1
1	1	1	145	0.81439	-1	-1
1	1	1	146	0.41527	-1	-1
1	1	1	147	0.49546	-1	-1
1	1	1	148	0.42295	-1	-1
1	1	1	149	0.39089	-1	-1
1	1	1	150	0.33497	-1	-1
1	1	1	151	0.87863	-1	-1
1	1	1	152	0.57461	-1	-1
1	1	1	153	0.59933	-1	-1
1	1	1	154	0.35861	-1	-1
1	1	1	155	0.35897	-1	-1
1	1	1	156	0.34254	-1	-1
1	1	1	157	0.60753	-1	-1
1	1	1	158	0.43919	-1	-1
1	1	1	159	0.45496	-1	-1
1	1	1	160	0.3981	-1	-1
1	1	1	161	0.49545	-1	-1
1	1	1	162	0.351	-1	-1
1	1	1	163	0.42285	-1	-1
1	1	1	164	0.35885	-1	-1
1	1	1	165	1.5343	-1	-1
1	1	1	166	0.3992	-1	-1
1	1	1	167	0.45549	-1	-1
1	1	1	168	0.42211	-1	-1
1	1	1	169	0.4157	-1	-1
1	1	1	170	1.0384	-1	-1
1	1	1	171	0.78304	-1	-1
1	1	1	172	0.54315	-1	-1
1	1	1	173	0.49426	-1	-1
1	1	1	174	0.42347	-1	-1
1	1	1	175	0.38239	-1	-1
1	1	1	176	0.39899	-1	-1
1	1	1	177	0.38323	-1	-1
1	1	1	178	0.45464	-1	-1
1	1	1	179	0.35981	-1	-1
1	1	1	180	0.69405	-1	-1
1	1	1	181	0.59924	-1	-1
1	1	1	182	0.52698	-1	-1
1	1	1	183	1.319	-1	-1
1	1	1	184	0.56726	-1	-1
1	1	1	185	1.0303	-1	-1
1	1	1	186	0.47118	-1	-1
1	1	1	187	0.39115	-1	-1
1	1	1	188	0.43841	-1	-1
1	1	1	189	0.60713	-1	-1
1	1	1	190	0.37476	-1	-1
1	1	1	191	0.39942	-1	-1
1	1	1	192	0.40646	-1	-1
1	1	1	193	0.41534	-1	-1
1	1	1	194	0.60663	-1	-1
1	1	1	195	0.46336	-1	-1
1	1	1	196	0.49458	-1	-1
1	1	1	197	0.47132	-1	-1
1	1	1	198	0.38287	-1	-1
1	1	1	199	0.39865	-1	-1
1	1	1	200	0.43119	-1	-1
1	1	1	201	0.34235	-1	-1
1	1	1	202	0.39925	-1	-1
1	1	1	203	0.58271	-1	-1
1	1	1	204	0.39953	-1	-1
1	1	1	205	0.36648	-1	-1
1	1	1	206	0.37523	-1	-1
1	1	1	207	0.33466	-1	-1
1	1	1	208	0.6385	-1	-1
1	1	1	209	0.3673	-1	-1
1	1	1	210	0.35929	-1	-1
1	1	1	211	0.47862	-1	-1
1	1	1	212	0.38326	-1	-1
1	1	1	213	0.3904	-1	-1
1	1	1	214	0.55125	-1	-1
1	1	1	215	0.3672	-1	-1
1	1	1	216	0.35802	-1	-1
1	1	1	217	0.37497	-1	-1
1	1	1	218	0.41558	-1	-1
1	1	1	219	0.71865	-1	-1
1	1	1	220	0.4796	-1	-1
1	1	1	221	0.41416	-1	-1
1	1	1	222	0.39942	-1	-1
1	1	1	223	0.32621	-1	-1
1	1	1	224	0.37524	-1	-1
1	1	1	225	0.36703	-1	-1
1	1	1	226	0.44659	-1	-1
1	1	1	227	0.41534	-1	-1
1	1	1	228	0.66332	-1	-1
1	1	1	229	0.86288	-1	-1
1	1	1	230	0.36694	-1	-1
1	1	1	231	0.78243	-1	-1
1	1	1	232	0.26252	-1	-1
1	1	1	233	0.36717	-1	-1
1	1	1	234	0.36692	-1	-1
1	1	1	235	0.57503	-1	-1
1	1	1	236	0.52741	-1	-1
1	1	1	237	0.49437	-1	-1
1	1	1	238	0.45509	-1	-1
1	1	1	239	0.37475	-1	-1
1	1	1	240	0.39111	-1	-1
1	1	1	241	0.37528	-1	-1
1	1	1	242	0.80674	-1	-1
1	1	1	243	0.3753	-1	-1
1	1	1	244	0.35053	-1	-1
1	1	1	245	0.43092	-1	-1
1	1	1	246	0.44663	-1	-1
1	1	1	247	0.47927	-1	-1
1	1	1	248	0.40738	-1	-1
1	1	1	249	0.69466	-1	-1
1	1	1	250	0.52638	-1	-1
1	1	1	251	0.55163	-1	-1
1	1	1	252	0.36613	-1	-1
1	1	1	253	0.59926	-1	-1
1	1	1	254	0.39118	-1	-1
1	1	1	255	0.53433	-1	-1
1	1	1	256	0.35165	-1	-1
1	1	1	257	0.37452	-1	-1
1	1	1	258	0.38324	-1	-1
1	1	1	259	0.40706	-1	-1
1	1	1	260	0.40698	-1	-1
1	1	1	261	0.34245	-1	-1
1	1	1	262	0.37503	-1	-1
1	1	1	263	0.35054	-1	-1
1	1	1	264	0.35966	-1	-1
1	1	1	265	0.67039	-1	-1
1	1	1	266	0.39869	-1	-1
1	1	1	267	0.38385	-1	-1
1	1	1	268	0.51054	-1	-1
1	1	1	269	0.27133	-1	-1
1	1	1	270	0.45398	-1	-1
1	1	1	271	0.42377	-1	-1
1	1	1	272	0.4142	-1	-1
1	1	1	273	0.39129	-1	-1
1	1	1	274	0.4227	-1	-1
1	1	1	275	0.6709	-1	-1
1	1	1	276	0.38339	-1	-1
1	1	1	277	0.39046	-1	-1
1	1	1	278	0.49472	-1	-1
1	1	1	279	0.39914	-1	-1
1	1	1	280	0.35961	-1	-1
1	1	1	281	0.61406	-1	-1
1	1	1	282	0.37543	-1	-1
1	1	1	283	0.35862	-1	-1
1	1	1	284	0.40722	-1	-1
1	1	1	285	0.3907	-1	-1
1	1	1	286	0.43091	-1	-1
1	1	1	287	0.38342	-1	-1
1	1	1	288	0.39095	-1	-1
1	1	1	289	0.37415	-1	-1
1	1	1	290	0.47126	-1	-1
1	1	1	291	0.40661	-1	-1
1	1	1	292	0.43119	-1	-1
1	1	1	293	0.55134	-1	-1
1	1	1	294	0.39088	-1	-1
1	1	1	295	0.55915	-1	-1
1	1	1	296	0.44607	-1	-1
1	1	1	297	0.43159	-1	-1
1	1	1	298	0.35869	-1	-1
1	1	1	299	0.40666	-1	-1
1	1	1	300	0.39107	-1	-1
1	1	1	301	0.40678	-1	-1
1	1	1	302	0.39881	-1	-1
1	1	1	303	0.37508	-1	-1
1	1	1	304	0.35181	-1	-1
1	1	1	305	0.39019	-1	-1
1	1	1	306	0.40688	-1	-1
1	1	1	307	0.48704	-1	-1
1	1	1	308	0.65517	-1	-1
1	1	1	309	0.36725	-1	-1
1	1	1	310	0.39897	-1	-1
1	1	1	311	0.44683	-1	-1
1	1	1	312	0.84641	-1	-1
1	1	1	313	0.39158	-1	-1
1	1	1	314	0.58257	-1	-1
1	1	1	315	0.407	-1	-1
1	1	1	316	0.31028	-1	-1
1	1	1	317	0.54356	-1	-1
1	1	1	318	0.3346	-1	-1
1	1	1	319	0.42356	-1	-1
1	1	1	320	0.30216	-1	-1
1	1	1	321	0.24697	-1	-1
1	1	1	322	0.33507	-1	-1
1	1	1	323	0.2875	-1	-1
1	1	1	324	0.33468	-1	-1
1	1	1	325	0.50265	-1	-1
1	1	1	326	0.39125	-1	-1
1	1	1	327	0.3503	-1	-1
1	1	1	328	0.3196	-1	-1
1	1	1	329	0.31053	-1	-1
1	1	1	330	0.32665	-1	-1
1	1	1	331	0.33549	-1	-1
1	1	1	332	0.28734	-1	-1
1	1	1	333	0.44645	-1	-1
1	1	1	334	0.36666	-1	-1
1	1	1	335	0.38291	-1	-1
1	1	1	336	0.36714	-1	-1
1	1	1	337	0.36678	-1	-1
1	1	1	338	0.45469	-1	-1
1	1	1	339	0.47159	-1	-1
1	1	1	340	0.43851	-1	-1
1	1	1	341	0.41539	-1	-1
1	1	1	342	0.41457	-1	-1
1	1	1	343	0.36668	-1	-1
1	1	1	344	0.27164	-1	-1
1	1	1	345	0.34225	-1	-1
1	1	1	346	0.34346	-1	-1
1	1	1	347	0.31069	-1	-1
1	1	1	348	0.32655	-1	-1
1	1	1	349	0.31144	-1	-1
1	1	1	350	0.63101	-1	-1
1	1	1	351	0.31853	-1	-1
1	1	1	352	0.31919	-1	-1
1	1	1	353	0.31051	-1	-1
1	1	1	354	0.48686	-1	-1
1	1	1	355	0.34347	-1	-1
1	1	1	356	0.43137	-1	-1
1	1	1	357	0.32621	-1	-1
1	1	1	358	0.38297	-1	-1
1	1	1	359	0.47098	-1	-1
1	1	1	360	0.36726	-1	-1
1	1	1	361	0.32689	-1	-1
1	1	1	362	0.30285	-1	-1
1	1	1	363	0.76649	-1	-1
1	1	1	364	0.40733	-1	-1
1	1	1	365	0.48667	-1	-1
1	1	1	366	0.37492	-1	-1
1	1	1	367	0.39967	-1	-1
1	1	1	368	0.34286	-1	-1
1	1	1	369	0.39841	-1	-1
1	1	1	370	0.31898	-1	-1
1	1	1	371	0.43147	-1	-1
1	1	1	372	0.30224	-1	-1
1	1	1	373	0.25472	-1	-1
1	1	1	374	0.34397	-1	-1
1	1	1	375	0.34232	-1	-1
1	1	1	376	0.60661	-1	-1
1	1	1	377	0.31979	-1	-1
1	1	1	378	0.28617	-1	-1
1	1	1	379	0.41471	-1	-1
1	1	1	380	0.35127	-1	-1
1	1	1	381	0.42277	-1	-1
1	1	1	382	0.19083	-1	-1
1	1	1	383	0.27101	-1	-1
1	1	1	384	0.35149	-1	-1
1	1	1	385	0.37446	-1	-1
1	1	1	386	0.36701	-1	-1
1	1	1	387	0.34314	-1	-1
1	1	1	388	0.5907	-1	-1
1	1	1	389	0.37537	-1	-1
1	1	1	390	0.28619	-1	-1
1	1	1	391	0.29513	-1	-1
1	1	1	392	0.35105	-1	-1
1	1	1	393	0.34335	-1	-1
1	1	1	394	0.37477	-1	-1
1	1	1	395	0.32662	-1	-1
1	1	1	396	0.40695	-1	-1
1	1	1	397	0.39102	-1	-1
1	1	1	398	0.35916	-1	-1
1	1	1	399	0.36738	-1	-1
1	1	1	400	0.39875	-1	-1
1	1	1	401	0.91838	-1	-1
1	1	1	402	0.32745	-1	-1
1	1	1	403	0.35018	-1	-1
1	1	1	404	0.60755	-1	-1
1	1	1	405	0.30292	-1	-1
1	1	1	406	0.31079	-1	-1
1	1	1	407	0.29528	-1	-1
1	1	1	408	0.2943	-1	-1
1	1	1	409	0.39923	-1	-1
1	1	1	410	0.32656	-1	-1
1	1	1	411	0.27139	-1	-1
1	1	1	412	0.32738	-1	-1
1	1	1	413	0.35071	-1	-1
1	1	1	414	0.31083	-1	-1
1	1	1	415	0.37528	-1	-1
1	1	1	416	0.33449	-1	-1
1	1	1	417	0.42317	-1	-1
1	1	1	418	0.47077	-1	-1
1	1	1	419	0.39889	-1	-1
1	1	1	420	0.42244	-1	-1
1	1	1	421	0.41494	-1	-1
1	1	1	422	0.59071	-1	-1
1	1	1	423	0.26301	-1	-1
1	1	1	424	0.19949	-1	-1
1	1	1	425	0.16642	-1	-1
1	1	1	426	0.43917	-1	-1
1	1	1	427	0.36669	-1	-1
1	1	1	428	0.23928	-1	-1
1	1	1	429	0.4875	-1	-1
1	1	1	430	0.19904	-1	-1
1	1	1	431	0.16652	-1	-1
1	1	1	432	0.39929	-1	-1
1	1	1	433	0.32697	-1	-1
1	1	1	434	0.29458	-1	-1
1	1	1	435	0.24683	-1	-1
1	1	1	436	0.20661	-1	-1
1	1	1	437	0.42272	-1	-1
1	1	1	438	0.35909	-1	-1
1	1	1	439	0.48774	-1	-1
1	1	1	440	0.19093	-1	-1
1	1	1	441	0.15103	-1	-1
1	1	1	442	0.22287	-1	-1
1	1	1	443	0.36625	-1	-1
1	1	1	444	0.5116	-1	-1
1	1	1	445	0.19828	-1	-1
1	1	1	446	0.09507	-1	-1
1	1	1	447	0.38341	-1	-1
1	1	1	448	0.35858	-1	-1
1	1	1	449	0.39123	-1	-1
1	1	1	450	0.33503	-1	-1
1	1	1	451	0.33427	-1	-1
1	1	1	452	0.39088	-1	-1
1	1	1	453	0.32744	-1	-1
1	1	1	454	0.37506	-1	-1
1	1	1	455	0.35064	-1	-1
1	1	1	456	0.35872	-1	-1
1	1	1	457	0.38299	-1	-1
1	1	1	458	0.32698	-1	-1
1	1	1	459	0.6154	-1	-1
1	1	1	460	0.38301	-1	-1
1	1	1	461	0.35047	-1	-1
1	1	1	462	0.44701	-1	-1
1	1	1	463	0.18309	-1	-1
1	1	1	464	0.51916	-1	-1
1	1	1	465	0.35887	-1	-1
1	1	1	466	0.2861	-1	-1
1	1	1	467	0.35941	-1	-1
1	1	1	468	0.28639	-1	-1
1	1	1	469	0.39985	-1	-1
1	1	1	470	0.35856	-1	-1
1	1	1	471	0.33454	-1	-1
1	1	1	472	0.23925	-1	-1
1	1	1	473	0.32681	-1	-1
1	1	1	474	0.31887	-1	-1
1	1	1	475	0.31152	-1	-1
1	1	1	476	0.38232	-1	-1
1	1	1	477	0.37466	-1	-1
1	1	1	478	0.31956	-1	-1
1	1	1	479	0.44631	-1	-1
1	1	1	480	0.43946	-1	-1
1	1	1	481	0.51142	-1	-1
1	1	1	482	0.37456	-1	-1
1	1	1	483	0.27069	-1	-1
1	1	1	484	0.25468	-1	-1
1	1	1	485	0.49564	-1	-1
1	1	1	486	0.3586	-1	-1
1	1	1	487	0.31112	-1	-1
1	1	1	488	0.25504	-1	-1
1	1	1	489	0.29433	-1	-1
1	1	1	490	0.34322	-1	-1
1	1	1	491	0.40698	-1	-1
1	1	1	492	0.29443	-1	-1
1	1	1	493	0.36699	-1	-1
1	1	1	494	0.36688	-1	-1
1	1	1	495	0.39899	-1	-1
1	1	1	496	0.40763	-1	-1
1	1	1	497	0.36618	-1	-1
1	1	1	498	0.58335	-1	-1
1	1	1	499	0.27883	-1	-1
1	1	1	500	0.25552	-1	-1
1	1	1	501	0.28609	-1	-1
1	1	1	502	0.28777	-1	-1
1	1	1	503	0.41418	-1	-1
1	1	1	504	0.25508	-1	-1
1	1	1	505	0.4635	-1	-1
1	1	1	506	0.35896	-1	-1
1	1	1	507	0.31815	-1	-1
1	1	1	508	0.31911	-1	-1
1	1	1	509	0.36714	-1	-1
1	1	1	510	0.40697	-1	-1
1	1	1	511	0.43071	-1	-1
1	1	1	512	0.34316	-1	-1
1	1	1	513	0.32643	-1	-1
1	1	1	514	0.31175	-1	-1
1	1	1	515	0.36617	-1	-1
1	1	1	516	0.32783	-1	-1
1	1	1	517	0.34262	-1	-1
1	1	1	518	0.32686	-1	-1
1	1	1	519	0.34336	-1	-1
1	1	1	520	0.35847	-1	-1
1	1	1	521	0.29477	-1	-1
1	1	1	522	0.35091	-1	-1
1	1	1	523	0.36721	-1	-1
1	1	1	524	0.83096	-1	-1
1	1	1	525	0.35074	-1	-1
1	1	1	526	0.27102	-1	-1
1	1	1	527	0.70299	-1	-1
1	1	1	528	0.32721	-1	-1
1	1	1	529	0.16661	-1	-1
1	1	1	530	0.39836	-1	-1
1	1	1	531	0.37493	-1	-1
1	1	1	532	0.30305	-1	-1
1	1	1	533	0.18343	-1	-1
1	1	1	534	2.0065	-1	-1
1	1	1	535	0.3908	-1	-1
1	1	1	536	0.53544	-1	-1
1	1	1	537	1.3986	-1	-1
1	1	1	538	0.88702	-1	-1
1	1	1	539	0.67118	-1	-1
1	1	1	540	0.38254	-1	-1
1	1	1	541	0.32698	-1	-1
1	1	1	542	0.36654	-1	-1
1	1	1	543	0.47886	-1	-1
1	1	1	544	0.40758	-1	-1
1	1	1	545	0.34325	-1	-1
1	1	1	546	0.35053	-1	-1
1	1	1	547	0.41509	-1	-1
1	1	1	548	0.3743	-1	-1
1	1	1	549	0.47127	-1	-1
1	1	1	550	0.39086	-1	-1
1	1	1	551	0.51893	-1	-1
1	1	1	552	0.38337	-1	-1
1	1	1	553	0.37487	-1	-1
1	1	1	554	0.26303	-1	-1
1	1	1	555	0.33493	-1	-1
1	1	1	556	0.52693	-1	-1
1	1	1	557	0.37497	-1	-1
1	1	1	558	0.39833	-1	-1
1	1	1	559	0.36753	-1	-1
1	1	1	560	0.263	-1	-1
1	1	1	561	0.35082	-1	-1
1	1	1	562	0.31887	-1	-1
1	1	1	563	0.45497	-1	-1
1	1	1	564	0.61457	-1	-1
1	1	1	565	0.31951	-1	-1
1	1	1	566	0.28634	-1	-1
1	1	1	567	0.34285	-1	-1
1	1	1	568	0.41481	-1	-1
1	1	1	569	0.49572	-1	-1
1	1	1	570	0.35896	-1	-1
1	1	1	571	0.3262	-1	-1
1	1	1	572	0.39078	-1	-1
1	1	1	573	0.37596	-1	-1
1	1	1	574	0.35836	-1	-1
1	1	1	575	0.40733	-1	-1
1	1	1	576	0.40661	-1	-1
1	1	1	577	0.39033	-1	-1
1	1	1	578	0.35907	-1	-1
1	1	1	579	0.42354	-1	-1
1	1	1	580	0.39858	-1	-1
1	1	1	581	0.31116	-1	-1
1	1	1	582	0.34263	-1	-1
1	1	1	583	0.36673	-1	-1
1	1	1	584	0.31939	-1	-1
1	1	1	585	0.39042	-1	-1
1	1	1	586	0.34323	-1	-1
1	1	1	587	0.3915	-1	-1
1	1	1	588	0.43848	-1	-1
1	1	1	589	0.41511	-1	-1
1	1	1	590	0.59835	-1	-1
1	1	1	591	0.56763	-1	-1
1	1	1	592	0.30286	-1	-1
1	1	1	593	0.31026	-1	-1
1	1	1	594	0.35144	-1	-1
1	1	1	595	0.35857	-1	-1
1	1	1	596	0.31117	-1	-1
1	1	1	597	0.24742	-1	-1
1	1	1	598	0.35809	-1	-1
1	1	1	599	0.31897	-1	-1
1	1	1	600	0.48766	-1	-1
1	1	1	601	0.27043	-1	-1
1	1	1	602	0.22366	-1	-1
1	1	1	603	0.25436	-1	-1
1	1	1	604	0.21549	-1	-1
1	1	1	605	0.45454	-1	-1
1	1	1	606	0.46255	-1	-1
1	1	1	607	0.35946	-1	-1
1	1	1	608	0.22219	-1	-1
1	1	1	609	0.28768	-1	-1
1	1	1	610	0.35888	-1	-1
1	1	1	611	0.38226	-1	-1
1	1	1	612	0.35967	-1	-1
1	1	1	613	0.30285	-1	-1
1	1	1	614	0.19081	-1	-1
1	1	1	615	0.3351	-1	-1
1	1	1	616	0.33446	-1	-1
1	1	1	617	0.3508	-1	-1
1	1	1	618	0.18326	-1	-1
1	1	1	619	0.29481	-1	-1
1	1	1	620	0.33545	-1	-1
1	1	1	621	0.18307	-1	-1
1	1	1	622	0.34257	-1	-1
1	1	1	623	0.33449	-1	-1
1	1	1	624	0.28709	-1	-1
1	1	1	625	0.19881	-1	-1
1	1	1	626	1.2872	-1	-1
1	1	1	627	0.36746	-1	-1
1	1	1	628	0.39805	-1	-1
1	1	1	629	0.52793	-1	-1
1	1	1	630	0.21393	-1	-1
1	1	1	631	2.031	-1	-1
1	1	1	632	0.20739	-1	-1
1	1	1	633	0.41466	-1	-1
1	1	1	634	1.8553	-1	-1
1	1	1	635	0.18267	-1	-1
1	1	1	636	0.15857	-1	-1
1	1	1	637	0.44701	-1	-1
1	1	1	638	0.32772	-1	-1
1	1	1	639	0.262	-1	-1
1	1	1	640	0.2314	-1	-1
1	1	1	641	0.20735	-1	-1
1	1	1	642	0.3909	-1	-1
1	1	1	643	0.33477	-1	-1
1	1	1	644	0.23075	-1	-1
1	1	1	645	0.22243	-1	-1
1	1	1	646	0.17587	-1	-1
1	1	1	647	0.21407	-1	-1
1	1	1	648	0.19933	-1	-1
1	1	1	649	0.53541	-1	-1
1	1	1	650	0.2224	-1	-1
1	1	1	651	1.991	-1	-1
1	1	1	652	0.38233	-1	-1
1	1	1	653	0.29531	-1	-1
1	1	1	654	0.38307	-1	-1
1	1	1	655	0.53464	-1	-1
1	1	1	656	0.37478	-1	-1
1	1	1	657	0.39904	-1	-1
1	1	1	658	0.25486	-1	-1
1	1	1	659	0.18342	-1	-1
1	1	1	660	0.23115	-1	-1
1	1	1	661	0.39118	-1	-1
1	1	1	662	0.34986	-1	-1
1	1	1	663	0.21584	-1	-1
1	1	1	664	0.1268	-1	-1
1	1	1	665	0.36662	-1	-1
1	1	1	666	0.31931	-1	-1
1	1	1	667	0.32661	-1	-1
1	1	1	668	0.34297	-1	-1
1	1	1	669	0.39864	-1	-1
1	1	1	670	0.19944	-1	-1
1	1	1	671	0.21514	-1	-1
1	1	1	672	0.25433	-1	-1
1	1	1	673	0.2871	-1	-1
1	1	1	674	0.20682	-1	-1
1	1	1	675	0.15895	-1	-1
1	1	1	676	0.89532	-1	-1
1	1	1	677	0.35909	-1	-1
1	1	1	678	0.19011	-1	-1
1	1	1	679	0.3437	-1	-1
1	1	1	680	0.21513	-1	-1
1	1	1	681	0.18264	-1	-1
1	1	1	682	0.29466	-1	-1
1	1	1	683	0.35859	-1	-1
1	1	1	684	0.22322	-1	-1
1	1	1	685	0.28757	-1	-1
1	1	1	686	0.33417	-1	-1
1	1	1	687	0.30287	-1	-1
1	1	1	688	0.31965	-1	-1
1	1	1	689	0.33415	-1	-1
1	1	1	690	0.42354	-1	-1
1	1	1	691	0.41451	-1	-1
1	1	1	692	0.19884	-1	-1
1	1	1	693	0.13506	-1	-1
1	1	1	694	0.3347	-1	-1
1	1	1	695	0.36733	-1	-1
1	1	1	696	0.19898	-1	-1
1	1	1	697	0.20743	-1	-1
1	1	1	698	0.20664	-1	-1
1	1	1	699	0.20683	-1	-1
1	1	1	700	0.2153	-1	-1
1	1	1	701	0.55013	-1	-1
1	1	1	702	0.29528	-1	-1
1	1	1	703	0.27856	-1	-1
1	1	1	704	0.31122	-1	-1
1	1	1	705	0.2626	-1	-1
1	1	1	706	0.26304	-1	-1
1	1	1	707	0.66308	-1	-1
1	1	1	708	0.55908	-1	-1
1	1	1	709	0.33496	-1	-1
1	1	1	710	0.22304	-1	-1
1	1	1	711	0.23078	-1	-1
1	1	1	712	0.23886	-1	-1
1	1	1	713	0.2553	-1	-1
1	1	1	714	0.64697	-1	-1
1	1	1	715	0.23888	-1	-1
1	1	1	716	0.27118	-1	-1
1	1	1	717	0.48688	-1	-1
1	1	1	718	0.19858	-1	-1
1	1	1	719	0.15133	-1	-1
1	1	1	720	0.57415	-1	-1
1	1	1	721	0.38368	-1	-1
1	1	1	722	0.24641	-1	-1
1	1	1	723	0.31919	-1	-1
1	1	1	724	0.31917	-1	-1
1	1	1	725	0.31857	-1	-1
1	1	1	726	0.35156	-1	-1
1	1	1	727	0.35837	-1	-1
1	1	1	728	0.35918	-1	-1
1	1	1	729	0.28639	-1	-1
1	1	1	730	0.31146	-1	-1
1	1	1	731	0.28656	-1	-1
1	1	1	732	0.27884	-1	-1
1	1	1	733	0.39153	-1	-1
1	1	1	734	0.91823	-1	-1
1	1	1	735	0.30292	-1	-1
1	1	1	736	0.43107	-1	-1
1	1	1	737	0.43125	-1	-1
1	1	1	738	0.92643	-1	-1
1	1	1	739	0.3434	-1	-1
1	1	1	740	0.39849	-1	-1
1	1	1	741	0.39136	-1	-1
1	1	1	742	1.7264	-1	-1
1	1	1	743	0.38389	-1	-1
1	1	1	744	0.38202	-1	-1
1	1	1	745	0.2468	-1	-1
1	1	1	746	0.43937	-1	-1
1	1	1	747	0.37493	-1	-1
1	1	1	748	0.29472	-1	-1
1	1	1	749	0.37464	-1	-1
1	1	1	750	0.39137	-1	-1
1	1	1	751	0.91947	-1	-1
1	1	1	752	0.43835	-1	-1
1	1	1	753	0.35906	-1	-1
1	1	1	754	0.38345	-1	-1
1	1	1	755	0.28688	-1	-1
1	1	1	756	0.558	-1	-1
1	1	1	757	0.43156	-1	-1
1	1	1	758	0.63895	-1	-1
1	1	1	759	0.33499	-1	-1
1	1	1	760	0.25445	-1	-1
1	1	1	761	0.25527	-1	-1
1	1	1	762	0.33456	-1	-1
1	1	1	763	0.40695	-1	-1
1	1	1	764	0.37537	-1	-1
1	1	1	765	0.43052	-1	-1
1	1	1	766	0.30343	-1	-1
1	1	1	767	0.31118	-1	-1
1	1	1	768	0.21472	-1	-1
1	1	1	769	0.25445	-1	-1
1	1	1	770	0.36717	-1	-1
1	1	1	771	0.34292	-1	-1
1	1	1	772	0.36701	-1	-1
1	1	1	773	0.39102	-1	-1
1	1	1	774	0.26305	-1	-1
1	1	1	775	0.55894	-1	-1
1	1	1	776	0.38264	-1	-1
1	1	1	777	7.9188	-1	-1
1	1	1	778	0.35094	-1	-1
1	1	1	779	0.30307	-1	-1
1	1	1	780	0.35872	-1	-1
1	1	1	781	0.34263	-1	-1
1	1	1	782	0.35947	-1	-1
1	1	1	783	0.70284	-1	-1
1	1	1	784	0.35902	-1	-1
1	1	1	785	0.36602	-1	-1
1	1	1	786	0.35138	-1	-1
1	1	1	787	0.38241	-1	-1
1	1	1	788	0.51962	-1	-1
1	1	1	789	0.54235	-1	-1
1	1	1	790	0.43138	-1	-1
1	1	1	791	0.50236	-1	-1
1	1	1	792	0.31928	-1	-1
1	1	1	793	0.30306	-1	-1
1	1	1	794	0.39939	-1	-1
1	1	1	795	0.36648	-1	-1
1	1	1	796	0.4067	-1	-1
1	1	1	797	0.31126	-1	-1
1	1	1	798	0.35125	-1	-1
1	1	1	799	0.43017	-1	-1
1	1	1	800	0.33503	-1	-1
1	1	1	801	0.2953	-1	-1
1	1	1	802	0.22308	-1	-1
1	1	1	803	0.35892	-1	-1
1	1	1	804	0.37478	-1	-1
1	1	1	805	0.33469	-1	-1
1	1	1	806	0.30279	-1	-1
1	1	1	807	0.31952	-1	-1
1	1	1	808	0.39025	-1	-1
1	1	1	809	0.31904	-1	-1
1	1	1	810	0.46369	-1	-1
1	1	1	811	0.43072	-1	-1
1	1	1	812	0.39861	-1	-1
1	1	1	813	0.50286	-1	-1
1	1	1	814	0.69536	-1	-1
1	1	1	815	0.31027	-1	-1
1	1	1	816	0.1513	-1	-1
1	1	1	817	0.42256	-1	-1
1	1	1	818	0.43938	-1	-1
1	1	1	819	0.3753	-1	-1
1	1	1	820	0.27055	-1	-1
1	1	1	821	0.3429	-1	-1
1	1	1	822	0.36682	-1	-1
1	1	1	823	0.37511	-1	-1
1	1	1	824	0.39057	-1	-1
1	1	1	825	0.25496	-1	-1
1	1	1	826	0.38343	-1	-1
1	1	1	827	0.35897	-1	-1
1	1	1	828	0.37501	-1	-1
1	1	1	829	0.26243	-1	-1
1	1	1	830	0.34261	-1	-1
1	1	1	831	0.35186	-1	-1
1	1	1	832	0.39002	-1	-1
1	1	1	833	0.39887	-1	-1
1	1	1	834	0.38319	-1	-1
1	1	1	835	0.39882	-1	-1
1	1	1	836	0.35898	-1	-1
1	1	1	837	0.32703	-1	-1
1	1	1	838	0.3274	-1	-1
1	1	1	839	0.34253	-1	-1
1	1	1	840	0.36744	-1	-1
1	1	1	841	0.37427	-1	-1
1	1	1	842	0.41579	-1	-1
1	1	1	843	0.35823	-1	-1
1	1	1	844	0.36715	-1	-1
1	1	1	845	0.79838	-1	-1
1	1	1	846	0.39955	-1	-1
1	1	1	847	0.3987	-1	-1
1	1	1	848	0.24685	-1	-1
1	1	1	849	0.37555	-1	-1
1	1	1	850	0.32662	-1	-1
1	1	1	851	0.33526	-1	-1
1	1	1	852	0.42226	-1	-1
1	1	1	853	0.43102	-1	-1
1	1	1	854	0.39957	-1	-1
1	1	1	855	0.36649	-1	-1
1	1	1	856	0.59052	-1	-1
1	1	1	857	0.36733	-1	-1
1	1	1	858	0.42298	-1	-1
1	1	1	859	0.41456	-1	-1
1	1	1	860	0.42289	-1	-1
1	1	1	861	0.40731	-1	-1
1	1	1	862	0.39148	-1	-1
1	1	1	863	0.33446	-1	-1
1	1	1	864	0.28712	-1	-1
1	1	1	865	0.38231	-1	-1
1	1	1	866	0.38313	-1	-1
1	1	1	867	0.65492	-1	-1
1	1	1	868	0.51144	-1	-1
1	1	1	869	0.39014	-1	-1
1	1	1	870	0.35117	-1	-1
1	1	1	871	0.35091	-1	-1
1	1	1	872	0.41519	-1	-1
1	1	1	873	0.40662	-1	-1
1	1	1	874	0.31888	-1	-1
1	1	1	875	0.37554	-1	-1
1	1	1	876	0.35026	-1	-1
1	1	1	877	0.35084	-1	-1
1	1	1	878	0.39904	-1	-1
1	1	1	879	0.43879	-1	-1
1	1	1	880	0.32774	-1	-1
1	1	1	881	0.36685	-1	-1
1	1	1	882	0.9426	-1	-1
1	1	1	883	0.35096	-1	-1
1	1	1	884	0.29457	-1	-1
1	1	1	885	0.30335	-1	-1
1	1	1	886	0.47128	-1	-1
1	1	1	887	0.4149	-1	-1
1	1	1	888	0.37459	-1	-1
1	1	1	889	0.34285	-1	-1
1	1	1	890	0.38273	-1	-1
1	1	1	891	0.35921	-1	-1
1	1	1	892	0.26255	-1	-1
1	1	1	893	0.35177	-1	-1
1	1	1	894	0.3104	-1	-1
1	1	1	895	0.31955	-1	-1
1	1	1	896	0.27893	-1	-1
1	1	1	897	0.28637	-1	-1
1	1	1	898	0.33457	-1	-1
1	1	1	899	0.31163	-1	-1
1	1	1	900	0.35843	-1	-1
1	1	1	901	0.41542	-1	-1
1	1	1	902	0.31053	-1	-1
1	1	1	903	0.31879	-1	-1
1	1	1	904	0.34385	-1	-1
1	1	1	905	0.37465	-1	-1
1	1	1	906	0.23827	-1	-1
1	1	1	907	0.38285	-1	-1
1	1	1	908	0.27941	-1	-1
1	1	1	909	0.34341	-1	-1
1	1	1	910	0.31011	-1	-1
1	1	1	911	0.40719	-1	-1
1	1	1	912	0.51858	-1	-1
1	1	1	913	0.36786	-1	-1
1	1	1	914	0.38247	-1	-1
1	1	1	915	0.37441	-1	-1
1	1	1	916	0.39147	-1	-1
1	1	1	917	0.42289	-1	-1
1	1	1	918	0.33535	-1	-1
1	1	1	919	0.35076	-1	-1
1	1	1	920	0.33521	-1	-1
1	1	1	921	0.32598	-1	-1
1	1	1	922	0.36724	-1	-1
1	1	1	923	0.40709	-1	-1
1	1	1	924	0.36647	-1	-1
1	1	1	925	0.32689	-1	-1
1	1	1	926	0.34392	-1	-1
1	1	1	927	0.28675	-1	-1
1	1	1	928	0.32708	-1	-1
1	1	1	929	0.21401	-1	-1
1	1	1	930	0.36717	-1	-1
1	1	1	931	0.2951	-1	-1
1	1	1	932	0.33462	-1	-1
1	1	1	933	0.43924	-1	-1
1	1	1	934	0.3506	-1	-1
1	1	1	935	0.23953	-1	-1
1	1	1	936	0.35125	-1	-1
1	1	1	937	0.27007	-1	-1
1	1	1	938	0.33531	-1	-1
1	1	1	939	0.32677	-1	-1
1	1	1	940	0.22264	-1	-1
1	1	1	941	0.41517	-1	-1
1	1	1	942	0.31911	-1	-1
1	1	1	943	0.2712	-1	-1
1	1	1	944	0.25518	-1	-1
1	1	1	945	0.29422	-1	-1
1	1	1	946	0.31083	-1	-1
1	1	1	947	0.37493	-1	-1
1	1	1	948	0.32685	-1	-1
1	1	1	949	0.32774	-1	-1
1	1	1	950	0.43812	-1	-1
1	1	1	951	0.38386	-1	-1
1	1	1	952	0.3422	-1	-1
1	1	1	953	0.36687	-1	-1
1	1	1	954	0.43183	-1	-1
1	1	1	955	0.54213	-1	-1
1	1	1	956	0.96669	-1	-1
1	1	1	957	0.41488	-1	-1
1	1	1	958	0.37553	-1	-1
1	1	1	959	0.34291	-1	-1
1	1	1	960	0.31066	-1	-1
1	1	1	961	0.31873	-1	-1
1	1	1	962	0.29521	-1	-1
1	1	1	963	0.80687	-1	-1
1	1	1	964	0.38289	-1	-1
1	1	1	965	0.2317	-1	-1
1	1	1	966	0.17487	-1	-1
1	1	1	967	0.39842	-1	-1
1	1	1	968	0.40718	-1	-1
1	1	1	969	0.3032	-1	-1
1	1	1	970	0.30249	-1	-1
1	1	1	971	0.26299	-1	-1
1	1	1	972	0.19835	-1	-1
1	1	1	973	0.42393	-1	-1
1	1	1	974	0.35797	-1	-1
1	1	1	975	0.40742	-1	-1
1	1	1	976	0.39908	-1	-1
1	1	1	977	0.30255	-1	-1
1	1	1	978	0.39087	-1	-1
1	1	1	979	0.24695	-1	-1
1	1	1	980	0.18283	-1	-1
1	1	1	981	0.60747	-1	-1
1	1	1	982	0.38293	-1	-1
1	1	1	983	0.33464	-1	-1
1	1	1	984	0.33469	-1	-1
1	1	1	985	0.31904	-1	-1
1	1	1	986	0.40753	-1	-1
1	1	1	987	0.39841	-1	-1
1	1	1	988	0.42354	-1	-1
1	1	1	989	0.52619	-1	-1
1	1	1	990	0.31121	-1	-1
1	1	1	991	1.5425	-1	-1
1	1	1	992	0.35117	-1	-1
1	1	1	993	0.32706	-1	-1
1	1	1	994	0.32673	-1	-1
1	1	1	995	2.4228	-1	-1
1	1	1	996	0.31888	-1	-1
1	1	1	997	0.31947	-1	-1
1	1	1	998	0.31933	-1	-1
1	1	1	999	0.36704	-1	-1
1	1	1	1000	0.3428	-1	-1
1	1	1	1001	0.31815	-1	-1
1	1	1	1002	0.32699	-1	-1
1	1	1	1003	0.35914	-1	-1
1	1	1	1004	0.31142	-1	-1
1	1	1	1005	0.38298	-1	-1
1	1	1	1006	0.34255	-1	-1
1	1	1	1007	0.44666	-1	-1
1	1	1	1008	0.36668	-1	-1
1	1	1	1009	0.35098	-1	-1
1	1	1	1010	0.33497	-1	-1
1	1	1	1011	0.33557	-1	-1
1	1	1	1012	0.3582	-1	-1
1	1	1	1013	0.38379	-1	-1
1	1	1	1014	0.3671	-1	-1
1	1	1	1015	0.36685	-1	-1
1	1	1	1016	0.37408	-1	-1
1	1	1	1017	0.35086	-1	-1
1	1	1	1018	0.2872	-1	-1
1	1	1	1019	0.31166	-1	-1
1	1	1	1020	0.36623	-1	-1
1	1	1	1021	0.35075	-1	-1
1	1	1	1022	0.29581	-1	-1
1	1	1	1023	0.31065	-1	-1
1	1	1	1024	0.32717	-1	-1
1	1	1	1025	0.3104	-1	-1
1	1	1	1026	0.35133	-1	-1
1	1	1	1027	0.30255	-1	-1
1	1	1	1028	0.39074	-1	-1
1	1	1	1029	0.36742	-1	-1
1	1	1	1030	0.31056	-1	-1
1	1	1	1031	0.29502	-1	-1
1	1	1	1032	0.43906	-1	-1
1	1	1	1033	1.4304	-1	-1
1	1	1	1034	0.45492	-1	-1
1	1	1	1035	0.33523	-1	-1
1	1	1	1036	0.34306	-1	-1
1	1	1	1037	0.37483	-1	-1
1	1	1	1038	0.35148	-1	-1
1	1	1	1039	0.35047	-1	-1
1	1	1	1040	0.35095	-1	-1
1	1	1	1041	0.39883	-1	-1
1	1	1	1042	0.40745	-1	-1
1	1	1	1043	0.39887	-1	-1
1	1	1	1044	0.36665	-1	-1
1	1	1	1045	0.375	-1	-1
1	1	1	1046	0.34329	-1	-1
1	1	1	1047	0.32638	-1	-1
1	1	1	1048	0.32745	-1	-1
1	1	1	1049	0.3668	-1	-1
1	1	1	1050	0.38289	-1	-1
1	1	1	1051	0.34226	-1	-1
1	1	1	1052	0.351	-1	-1
1	1	1	1053	0.32736	-1	-1
1	1	1	1054	0.44681	-1	-1
1	1	1	1055	0.40662	-1	-1
1	1	1	1056	0.36771	-1	-1
1	1	1	1057	0.39014	-1	-1
1	1	1	1058	0.31905	-1	-1
1	1	1	1059	0.33513	-1	-1
1	1	1	1060	0.27907	-1	-1
1	1	1	1061	0.36674	-1	-1
1	1	1	1062	0.31904	-1	-1
1	1	1	1063	0.40747	-1	-1
1	1	1	1064	0.35829	-1	-1
1	1	1	1065	0.33468	-1	-1
1	1	1	1066	0.39943	-1	-1
1	1	1	1067	0.41445	-1	-1
1	1	1	1068	0.32746	-1	-1
1	1	1	1069	0.39052	-1	-1
1	1	1	1070	0.39147	-1	-1
1	1	1	1071	0.38246	-1	-1
1	1	1	1072	0.32703	-1	-1
1	1	1	1073	0.36675	-1	-1
1	1	1	1074	0.31899	-1	-1
1	1	1	1075	0.3989	-1	-1
1	1	1	1076	0.359	-1	-1
1	1	1	1077	0.34276	-1	-1
1	1	1	1078	0.38324	-1	-1
1	1	1	1079	0.35939	-1	-1
1	1	1	1080	0.39846	-1	-1
1	1	1	1081	0.40689	-1	-1
1	1	1	1082	0.31163	-1	-1
1	1	2	1	0.85415	-1	-1
1	1	2	2	0.67121	-1	-1
1	1	2	3	0.64718	-1	-1
1	1	2	4	0.65523	-1	-1
1	1	2	5	0.58213	-1	-1
1	1	2	6	0.68768	-1	-1
1	1	2	7	0.64627	-1	-1
1	1	2	8	0.63143	-1	-1
1	1	2	9	0.56641	-1	-1
1	1	2	10	0.75879	-1	-1
1	1	2	11	0.60738	-1	-1
1	1	2	12	0.5508	-1	-1
1	1	2	13	0.56723	-1	-1
1	1	2	14	0.82251	-1	-1
1	1	2	15	0.67859	-1	-1
1	1	2	16	0.63894	-1	-1
1	1	2	17	0.55122	-1	-1
1	1	2	18	0.56677	-1	-1
1	1	2	19	0.56764	-1	-1
1	1	2	20	0.51825	-1	-1
1	1	2	21	0.5831	-1	-1
1	1	2	22	0.48727	-1	-1
1	1	2	23	0.53508	-1	-1
1	1	2	24	0.62231	-1	-1
1	1	2	25	0.51862	-1	-1
1	1	2	26	0.49499	-1	-1
1	1	2	27	0.49563	-1	-1
1	1	2	28	0.63058	-1	-1
1	1	2	29	0.85469	-1	-1
1	1	2	30	0.56731	-1	-1
1	1	2	31	0.70232	-1	-1
1	1	2	32	0.98363	-1	-1
1	1	2	33	0.49458	-1	-1
1	1	2	34	0.71113	-1	-1
1	1	2	35	0.67901	-1	-1
1	1	2	36	0.56675	-1	-1
1	1	2	37	1.0627	-1	-1
1	1	2	38	0.51885	-1	-1
1	1	2	39	0.52748	-1	-1
1	1	2	40	0.63807	-1	-1
1	1	2	41	0.55898	-1	-1
1	1	2	42	0.51968	-1	-1
1	1	2	43	0.56614	-1	-1
1	1	2	44	0.59928	-1	-1
1	1	2	45	0.75857	-1	-1
1	1	2	46	1.0951	-1	-1
1	1	2	47	0.74312	-1	-1
1	1	2	48	1.063	-1	-1
1	1	2	49	0.63043	-1	-1
1	1	2	50	0.5435	-1	-1
1	1	2	51	0.55024	-1	-1
1	1	2	52	0.56691	-1	-1
1	1	2	53	0.51914	-1	-1
1	1	2	54	0.54364	-1	-1
1	1	2	55	0.63862	-1	-1
1	1	2	56	0.55024	-1	-1
1	1	2	57	0.66357	-1	-1
1	1	2	58	0.43872	-1	-1
1	1	2	59	0.56702	-1	-1
1	1	2	60	0.4543	-1	-1
1	1	2	61	0.54349	-1	-1
1	1	2	62	0.59073	-1	-1
1	1	2	63	0.56712	-1	-1
1	1	2	64	0.58283	-1	-1
1	1	2	65	0.52686	-1	-1
1	1	2	66	0.57542	-1	-1
1	1	2	67	0.48705	-1	-1
1	1	2	68	0.57415	-1	-1
1	1	2	69	0.50306	-1	-1
1	1	2	70	0.63904	-1	-1
1	1	2	71	0.52709	-1	-1
1	1	2	72	0.54297	-1	-1
1	1	2	73	0.51828	-1	-1
1	1	2	74	0.52728	-1	-1
1	1	2	75	0.49553	-1	-1
1	1	2	76	0.54214	-1	-1
1	1	2	77	0.60671	-1	-1
1	1	2	78	0.48724	-1	-1
1	1	2	79	0.56745	-1	-1
1	1	2	80	0.58241	-1	-1
1	1	2	81	0.49509	-1	-1
1	1	2	82	0.57531	-1	-1
1	1	2	83	0.55104	-1	-1
1	1	2	84	0.53391	-1	-1
1	1	2	85	0.58294	-1	-1
1	1	2	86	0.52724	-1	-1
1	1	2	87	0.45552	-1	-1
1	1	2	88	0.49416	-1	-1
1	1	2	89	0.59154	-1	-1
1	1	2	90	0.47022	-1	-1
1	1	2	91	0.61484	-1	-1
1	1	2	92	0.45556	-1	-1
1	1	2	93	0.50322	-1	-1
1	1	2	94	0.5668	-1	-1
1	1	2	95	0.4862	-1	-1
1	1	2	96	0.51879	-1	-1
1	1	2	97	0.55102	-1	-1
1	1	2	98	0.44751	-1	-1
1	1	2	99	0.55907	-1	-1
1	1	2	100	0.58269	-1	-1
1	1	2	101	0.5033	-1	-1
1	1	2	102	0.45472	-1	-1
1	1	2	103	0.55903	-1	-1
1	1	2	104	0.47065	-1	-1
1	1	2	105	0.487	-1	-1
1	1	2	106	0.52634	-1	-1
1	1	2	107	0.5032	-1	-1
1	1	2	108	0.49467	-1	-1
1	1	2	109	0.51941	-1	-1
1	1	2	110	0.50263	-1	-1
1	1	2	111	0.45495	-1	-1
1	1	2	112	0.58283	-1	-1
1	1	2	113	0.48707	-1	-1
1	1	2	114	0.48678	-1	-1
1	1	2	115	1.0306	-1	-1
1	1	2	116	0.47932	-1	-1
1	1	2	117	0.58255	-1	-1
1	1	2	118	0.48724	-1	-1
1	1	2	119	0.51143	-1	-1
1	1	2	120	0.48634	-1	-1
1	1	2	121	0.5828	-1	-1
1	1	2	122	0.50337	-1	-1
1	1	2	123	0.55062	-1	-1
1	1	2	124	0.51868	-1	-1
1	1	2	125	0.51928	-1	-1
1	1	2	126	0.40758	-1	-1
1	1	2	127	0.57406	-1	-1
1	1	2	128	0.46325	-1	-1
1	1	2	129	0.51877	-1	-1
1	1	2	130	0.51064	-1	-1
1	1	2	131	0.56754	-1	-1
1	1	2	132	0.51122	-1	-1
1	1	2	133	0.57414	-1	-1
1	1	2	134	0.49525	-1	-1
1	1	2	135	0.55841	-1	-1
1	1	2	136	0.53497	-1	-1
1	1	2	137	0.56683	-1	-1
1	1	2	138	0.52784	-1	-1
1	1	2	139	0.93402	-1	-1
1	1	2	140	0.58344	-1	-1
1	1	2	141	0.55937	-1	-1
1	1	2	142	0.50995	-1	-1
1	1	2	143	0.50394	-1	-1
1	1	2	144	0.59801	-1	-1
1	1	2	145	0.61483	-1	-1
1	1	2	146	0.59087	-1	-1
1	1	2	147	0.57596	-1	-1
1	1	2	148	0.61469	-1	-1
1	1	2	149	0.51887	-1	-1
1	1	2	150	0.57448	-1	-1
1	1	2	151	0.58264	-1	-1
1	1	2	152	0.87132	-1	-1
1	1	2	153	0.56688	-1	-1
1	1	2	154	0.67141	-1	-1
1	1	2	155	0.65448	-1	-1
1	1	2	156	0.55904	-1	-1
1	1	2	157	0.68666	-1	-1
1	1	2	158	0.60766	-1	-1
1	1	2	159	0.63081	-1	-1
1	1	2	160	0.56637	-1	-1
1	1	2	161	0.5826	-1	-1
1	1	2	162	0.55926	-1	-1
1	1	2	163	0.44763	-1	-1
1	1	2	164	0.4945	-1	-1
1	1	2	165	0.50327	-1	-1
1	1	2	166	0.47077	-1	-1
1	1	2	167	0.51833	-1	-1
1	1	2	168	0.47918	-1	-1
1	1	2	169	0.59852	-1	-1
1	1	2	170	0.48762	-1	-1
1	1	2	171	0.64655	-1	-1
1	1	2	172	0.69554	-1	-1
1	1	2	173	0.47041	-1	-1
1	1	2	174	0.50291	-1	-1
1	1	2	175	0.49461	-1	-1
1	1	2	176	0.46332	-1	-1
1	1	2	177	0.61526	-1	-1
1	1	2	178	0.51843	-1	-1
1	1	2	179	0.56742	-1	-1
1	1	2	180	0.6941	-1	-1
1	1	2	181	0.59961	-1	-1
1	1	2	182	0.66272	-1	-1
1	1	2	183	0.55897	-1	-1
1	1	2	184	0.57431	-1	-1
1	1	2	185	1.5835	-1	-1
1	1	2	186	0.68625	-1	-1
1	1	2	187	0.65546	-1	-1
1	1	2	188	0.51087	-1	-1
1	1	2	189	0.56717	-1	-1
1	1	2	190	0.51068	-1	-1
1	1	2	191	0.59952	-1	-1
1	1	2	192	0.47796	-1	-1
1	1	2	193	0.5353	-1	-1
1	1	2	194	0.57531	-1	-1
1	1	2	195	0.53505	-1	-1
1	1	2	196	0.65399	-1	-1
1	1	2	197	0.43184	-1	-1
1	1	2	198	0.44633	-1	-1
1	1	2	199	0.55851	-1	-1
1	1	2	200	0.5029	-1	-1
1	1	2	201	0.47986	-1	-1
1	1	2	202	0.58259	-1	-1
1	1	2	203	0.57525	-1	-1
1	1	2	204	0.55049	-1	-1
1	1	2	205	0.71905	-1	-1
1	1	2	206	0.47844	-1	-1
1	1	2	207	0.57543	-1	-1
1	1	2	208	0.57434	-1	-1
1	1	2	209	0.49487	-1	-1
1	1	2	210	0.50311	-1	-1
1	1	2	211	0.51082	-1	-1
1	1	2	212	0.53579	-1	-1
1	1	2	213	0.60674	-1	-1
1	1	2	214	0.51866	-1	-1
1	1	2	215	0.48654	-1	-1
1	1	2	216	0.6311	-1	-1
1	1	2	217	0.655	-1	-1
1	1	2	218	0.61459	-1	-1
1	1	2	219	0.66292	-1	-1
1	1	2	220	0.48768	-1	-1
1	1	2	221	0.43886	-1	-1
1	1	2	222	0.51116	-1	-1
1	1	2	223	0.56631	-1	-1
1	1	2	224	0.4869	-1	-1
1	1	2	225	0.55951	-1	-1
1	1	2	226	0.57445	-1	-1
1	1	2	227	0.51904	-1	-1
1	1	2	228	0.58322	-1	-1
1	1	2	229	0.73472	-1	-1
1	1	2	230	0.51107	-1	-1
1	1	2	231	0.58247	-1	-1
1	1	2	232	0.56732	-1	-1
1	1	2	233	0.6065	-1	-1
1	1	2	234	0.58358	-1	-1
1	1	2	235	0.52675	-1	-1
1	1	2	236	0.647	-1	-1
1	1	2	237	0.43082	-1	-1
1	1	2	238	0.59858	-1	-1
1	1	2	239	0.575	-1	-1
1	1	2	240	0.55868	-1	-1
1	1	2	241	0.56716	-1	-1
1	1	2	242	0.53446	-1	-1
1	1	2	243	0.54383	-1	-1
1	1	2	244	0.67006	-1	-1
1	1	2	245	0.62328	-1	-1
1	1	2	246	0.53498	-1	-1
1	1	2	247	0.57442	-1	-1
1	1	2	248	0.59183	-1	-1
1	1	2	249	0.58229	-1	-1
1	1	2	250	0.59069	-1	-1
1	1	2	251	0.64717	-1	-1
1	1	2	252	0.575	-1	-1
1	1	2	253	0.59856	-1	-1
1	1	2	254	0.55908	-1	-1
1	1	2	255	0.58362	-1	-1
1	1	2	256	0.57485	-1	-1
1	1	2	257	0.47886	-1	-1
1	1	2	258	0.51073	-1	-1
1	1	2	259	0.52662	-1	-1
1	1	2	260	0.53567	-1	-1
1	1	2	261	0.54251	-1	-1
1	1	2	262	0.43896	-1	-1
1	1	2	263	0.5343	-1	-1
1	1	2	264	0.44758	-1	-1
1	1	2	265	0.62285	-1	-1
1	1	2	266	0.55927	-1	-1
1	1	2	267	0.75826	-1	-1
1	1	2	268	0.56663	-1	-1
1	1	2	269	0.53559	-1	-1
1	1	2	270	0.51825	-1	-1
1	1	2	271	0.43156	-1	-1
1	1	2	272	0.51086	-1	-1
1	1	2	273	0.5347	-1	-1
1	1	2	274	0.59061	-1	-1
1	1	2	275	0.53574	-1	-1
1	1	2	276	0.44653	-1	-1
1	1	2	277	0.47851	-1	-1
1	1	2	278	0.56746	-1	-1
1	1	2	279	0.92699	-1	-1
1	1	2	280	0.52673	-1	-1
1	1	2	281	0.72668	-1	-1
1	1	2	282	0.4551	-1	-1
1	1	2	283	0.43124	-1	-1
1	1	2	284	0.57489	-1	-1
1	1	2	285	0.4869	-1	-1
1	1	2	286	0.4944	-1	-1
1	1	2	287	0.51972	-1	-1
1	1	2	288	0.40603	-1	-1
1	1	2	289	0.48731	-1	-1
1	1	2	290	0.59872	-1	-1
1	1	2	291	0.44684	-1	-1
1	1	2	292	0.63102	-1	-1
1	1	2	293	0.58364	-1	-1
1	1	2	294	0.51018	-1	-1
1	1	2	295	0.59106	-1	-1
1	1	2	296	0.43105	-1	-1
1	1	2	297	0.48727	-1	-1
1	1	2	298	0.51855	-1	-1
1	1	2	299	0.55126	-1	-1
1	1	2	300	0.55095	-1	-1
1	1	2	301	0.54243	-1	-1
1	1	2	302	0.55873	-1	-1
1	1	2	303	0.55955	-1	-1
1	1	2	304	0.48671	-1	-1
1	1	2	305	0.55097	-1	-1
1	1	2	306	0.59036	-1	-1
1	1	2	307	0.55111	-1	-1
1	1	2	308	0.79155	-1	-1
1	1	2	309	0.45485	-1	-1
1	1	2	310	0.59019	-1	-1
1	1	2	311	0.71919	-1	-1
1	1	2	312	0.58353	-1	-1
1	1	2	313	0.5582	-1	-1
1	1	2	314	0.60717	-1	-1
1	1	2	315	0.50254	-1	-1
1	1	2	316	0.44701	-1	-1
1	1	2	317	0.59138	-1	-1
1	1	2	318	0.45467	-1	-1
1	1	2	319	0.45493	-1	-1
1	1	2	320	0.60772	-1	-1
1	1	2	321	0.4547	-1	-1
1	1	2	322	0.47816	-1	-1
1	1	2	323	0.3829	-1	-1
1	1	2	324	0.55897	-1	-1
1	1	2	325	0.47919	-1	-1
1	1	2	326	0.45489	-1	-1
1	1	2	327	0.47083	-1	-1
1	1	2	328	0.44747	-1	-1
1	1	2	329	0.5827	-1	-1
1	1	2	330	0.44714	-1	-1
1	1	2	331	0.48686	-1	-1
1	1	2	332	0.48639	-1	-1
1	1	2	333	0.55137	-1	-1
1	1	2	334	0.7189	-1	-1
1	1	2	335	0.58299	-1	-1
1	1	2	336	0.54323	-1	-1
1	1	2	337	0.54192	-1	-1
1	1	2	338	0.61583	-1	-1
1	1	2	339	0.78293	-1	-1
1	1	2	340	0.57479	-1	-1
1	1	2	341	0.59113	-1	-1
1	1	2	342	0.59812	-1	-1
1	1	2	343	0.58279	-1	-1
1	1	2	344	0.63927	-1	-1
1	1	2	345	0.43076	-1	-1
1	1	2	346	0.50348	-1	-1
1	1	2	347	0.59069	-1	-1
1	1	2	348	0.53478	-1	-1
1	1	2	349	0.52723	-1	-1
1	1	2	350	0.60638	-1	-1
1	1	2	351	0.50328	-1	-1
1	1	2	352	0.52709	-1	-1
1	1	2	353	0.54292	-1	-1
1	1	2	354	0.44679	-1	-1
1	1	2	355	0.47927	-1	-1
1	1	2	356	0.5102	-1	-1
1	1	2	357	0.61491	-1	-1
1	1	2	358	0.43954	-1	-1
1	1	2	359	0.55108	-1	-1
1	1	2	360	0.48624	-1	-1
1	1	2	361	0.54264	-1	-1
1	1	2	362	0.59969	-1	-1
1	1	2	363	0.61513	-1	-1
1	1	2	364	0.56694	-1	-1
1	1	2	365	0.57436	-1	-1
1	1	2	366	0.78284	-1	-1
1	1	2	367	0.56659	-1	-1
1	1	2	368	0.56752	-1	-1
1	1	2	369	0.59059	-1	-1
1	1	2	370	0.55136	-1	-1
1	1	2	371	0.55833	-1	-1
1	1	2	372	0.51969	-1	-1
1	1	2	373	0.43035	-1	-1
1	1	2	374	0.58343	-1	-1
1	1	2	375	0.52619	-1	-1
1	1	2	376	0.63176	-1	-1
1	1	2	377	0.4225	-1	-1
1	1	2	378	0.60659	-1	-1
1	1	2	379	0.43113	-1	-1
1	1	2	380	0.72711	-1	-1
1	1	2	381	0.38239	-1	-1
1	1	2	382	0.48765	-1	-1
1	1	2	383	0.39865	-1	-1
1	1	2	384	0.51878	-1	-1
1	1	2	385	0.51884	-1	-1
1	1	2	386	0.41557	-1	-1
1	1	2	387	0.8389	-1	-1
1	1	2	388	0.73444	-1	-1
1	1	2	389	0.47112	-1	-1
1	1	2	390	0.4071	-1	-1
1	1	2	391	0.50305	-1	-1
1	1	2	392	0.51088	-1	-1
1	1	2	393	0.47905	-1	-1
1	1	2	394	0.45496	-1	-1
1	1	2	395	0.52656	-1	-1
1	1	2	396	0.49476	-1	-1
1	1	2	397	0.52732	-1	-1
1	1	2	398	0.42227	-1	-1
1	1	2	399	0.57485	-1	-1
1	1	2	400	0.49518	-1	-1
1	1	2	401	0.50326	-1	-1
1	1	2	402	0.67913	-1	-1
1	1	2	403	0.47825	-1	-1
1	1	2	404	0.51165	-1	-1
1	1	2	405	0.43011	-1	-1
1	1	2	406	0.70373	-1	-1
1	1	2	407	0.49493	-1	-1
1	1	2	408	0.44622	-1	-1
1	1	2	409	0.5596	-1	-1
1	1	2	410	0.54204	-1	-1
1	1	2	411	0.39111	-1	-1
1	1	2	412	0.4948	-1	-1
1	1	2	413	0.55142	-1	-1
1	1	2	414	0.59114	-1	-1
1	1	2	415	0.63869	-1	-1
1	1	2	416	0.59126	-1	-1
1	1	2	417	0.56683	-1	-1
1	1	2	418	0.96668	-1	-1
1	1	2	419	0.67064	-1	-1
1	1	2	420	0.48756	-1	-1
1	1	2	421	0.5429	-1	-1
1	1	2	422	0.67092	-1	-1
1	1	2	423	0.67809	-1	-1
1	1	2	424	0.43955	-1	-1
1	1	2	425	0.56632	-1	-1
1	1	2	426	0.5916	-1	-1
1	1	2	427	0.5511	-1	-1
1	1	2	428	0.39896	-1	-1
1	1	2	429	0.53481	-1	-1
1	1	2	430	0.47061	-1	-1
1	1	2	431	0.46272	-1	-1
1	1	2	432	0.51955	-1	-1
1	1	2	433	0.65416	-1	-1
1	1	2	434	0.42366	-1	-1
1	1	2	435	0.50257	-1	-1
1	1	2	436	0.5433	-1	-1
1	1	2	437	0.48623	-1	-1
1	1	2	438	0.49501	-1	-1
1	1	2	439	0.51954	-1	-1
1	1	2	440	0.43024	-1	-1
1	1	2	441	0.47125	-1	-1
1	1	2	442	0.53446	-1	-1
1	1	2	443	0.48713	-1	-1
1	1	2	444	0.52679	-1	-1
1	1	2	445	0.46283	-1	-1
1	1	2	446	0.54286	-1	-1
1	1	2	447	0.42398	-1	-1
1	1	2	448	0.5269	-1	-1
1	1	2	449	0.45444	-1	-1
1	1	2	450	0.6227	-1	-1
1	1	2	451	0.49502	-1	-1
1	1	2	452	0.48665	-1	-1
1	1	2	453	0.40695	-1	-1
1	1	2	454	0.4788	-1	-1
1	1	2	455	0.82359	-1	-1
1	1	2	456	0.52693	-1	-1
1	1	2	457	0.39083	-1	-1
1	1	2	458	0.43863	-1	-1
1	1	2	459	0.57501	-1	-1
1	1	2	460	0.49478	-1	-1
1	1	2	461	0.51881	-1	-1
1	1	2	462	0.679	-1	-1
1	1	2	463	0.43887	-1	-1
1	1	2	464	0.64737	-1	-1
1	1	2	465	0.35882	-1	-1
1	1	2	466	0.55057	-1	-1
1	1	2	467	0.5353	-1	-1
1	1	2	468	0.43104	-1	-1
1	1	2	469	0.53481	-1	-1
1	1	2	470	0.50309	-1	-1
1	1	2	471	0.51068	-1	-1
1	1	2	472	0.51134	-1	-1
1	1	2	473	0.44692	-1	-1
1	1	2	474	0.43807	-1	-1
1	1	2	475	0.47922	-1	-1
1	1	2	476	0.45513	-1	-1
1	1	2	477	0.61494	-1	-1
1	1	2	478	0.48734	-1	-1
1	1	2	479	0.82999	-1	-1
1	1	2	480	0.49523	-1	-1
1	1	2	481	0.49463	-1	-1
1	1	2	482	0.53543	-1	-1
1	1	2	483	0.65532	-1	-1
1	1	2	484	0.63057	-1	-1
1	1	2	485	0.54238	-1	-1
1	1	2	486	0.41525	-1	-1
1	1	2	487	0.48664	-1	-1
1	1	2	488	0.46287	-1	-1
1	1	2	489	0.47959	-1	-1
1	1	2	490	0.48668	-1	-1
1	1	2	491	0.65494	-1	-1
1	1	2	492	0.78283	-1	-1
1	1	2	493	0.43124	-1	-1
1	1	2	494	0.43867	-1	-1
1	1	2	495	0.47901	-1	-1
1	1	2	496	0.49471	-1	-1
1	1	2	497	0.62338	-1	-1
1	1	2	498	0.54242	-1	-1
1	1	2	499	0.447	-1	-1
1	1	2	500	0.55144	-1	-1
1	1	2	501	0.42261	-1	-1
1	1	2	502	0.43108	-1	-1
1	1	2	503	0.87083	-1	-1
1	1	2	504	0.55102	-1	-1
1	1	2	505	0.44617	-1	-1
1	1	2	506	0.50293	-1	-1
1	1	2	507	0.47999	-1	-1
1	1	2	508	0.48616	-1	-1
1	1	2	509	0.53494	-1	-1
1	1	2	510	0.51881	-1	-1
1	1	2	511	0.54322	-1	-1
1	1	2	512	0.40707	-1	-1
1	1	2	513	0.4709	-1	-1
1	1	2	514	0.53504	-1	-1
1	1	2	515	0.5665	-1	-1
1	1	2	516	0.55931	-1	-1
1	1	2	517	0.48715	-1	-1
1	1	2	518	0.43044	-1	-1
1	1	2	519	0.43147	-1	-1
1	1	2	520	0.49423	-1	-1
1	1	2	521	0.51155	-1	-1
1	1	2	522	0.65463	-1	-1
1	1	2	523	0.97482	-1	-1
1	1	2	524	0.49528	-1	-1
1	1	2	525	0.47878	-1	-1
1	1	2	526	0.6151	-1	-1
1	1	2	527	0.99876	-1	-1
1	1	2	528	0.43115	-1	-1
1	1	2	529	0.56593	-1	-1
1	1	2	530	0.59153	-1	-1
1	1	2	531	0.46248	-1	-1
1	1	2	532	0.6397	-1	-1
1	1	2	533	1.079	-1	-1
1	1	2	534	2.2868	-1	-1
1	1	2	535	0.90267	-1	-1
1	1	2	536	0.50276	-1	-1
1	1	2	537	0.8951	-1	-1
1	1	2	538	0.5748	-1	-1
1	1	2	539	0.40704	-1	-1
1	1	2	540	2.0062	-1	-1
1	1	2	541	0.34321	-1	-1
1	1	2	542	0.57531	-1	-1
1	1	2	543	0.56712	-1	-1
1	1	2	544	0.45452	-1	-1
1	1	2	545	0.47044	-1	-1
1	1	2	546	0.56706	-1	-1
1	1	2	547	0.99104	-1	-1
1	1	2	548	0.46263	-1	-1
1	1	2	549	0.6156	-1	-1
1	1	2	550	0.51815	-1	-1
1	1	2	551	0.64729	-1	-1
1	1	2	552	0.76659	-1	-1
1	1	2	553	0.43086	-1	-1
1	1	2	554	0.51959	-1	-1
1	1	2	555	0.40668	-1	-1
1	1	2	556	0.71912	-1	-1
1	1	2	557	0.58229	-1	-1
1	1	2	558	0.56706	-1	-1
1	1	2	559	0.53549	-1	-1
1	1	2	560	0.53435	-1	-1
1	1	2	561	0.46383	-1	-1
1	1	2	562	0.58248	-1	-1
1	1	2	563	0.55083	-1	-1
1	1	2	564	0.64721	-1	-1
1	1	2	565	0.45453	-1	-1
1	1	2	566	0.49534	-1	-1
1	1	2	567	0.61444	-1	-1
1	1	2	568	0.63951	-1	-1
1	1	2	569	0.614	-1	-1
1	1	2	570	0.60776	-1	-1
1	1	2	571	0.52677	-1	-1
1	1	2	572	0.60679	-1	-1
1	1	2	573	0.66264	-1	-1
1	1	2	574	0.41499	-1	-1
1	1	2	575	0.62299	-1	-1
1	1	2	576	0.56719	-1	-1
1	1	2	577	0.57493	-1	-1
1	1	2	578	0.52622	-1	-1
1	1	2	579	0.8	-1	-1
1	1	2	580	0.62251	-1	-1
1	1	2	581	0.59079	-1	-1
1	1	2	582	0.46297	-1	-1
1	1	2	583	0.55838	-1	-1
1	1	2	584	0.37505	-1	-1
1	1	2	585	0.81532	-1	-1
1	1	2	586	0.39866	-1	-1
1	1	2	587	0.59962	-1	-1
1	1	2	588	0.67803	-1	-1
1	1	2	589	0.4789	-1	-1
1	1	2	590	0.47117	-1	-1
1	1	2	591	0.51132	-1	-1
1	1	2	592	0.43839	-1	-1
1	1	2	593	0.67129	-1	-1
1	1	2	594	0.47116	-1	-1
1	1	2	595	0.42231	-1	-1
1	1	2	596	0.46363	-1	-1
1	1	2	597	0.471	-1	-1
1	1	2	598	0.51063	-1	-1
1	1	2	599	0.6313	-1	-1
1	1	2	600	0.5901	-1	-1
1	1	2	601	0.51095	-1	-1
1	1	2	602	0.6073	-1	-1
1	1	2	603	0.70305	-1	-1
1	1	2	604	0.72688	-1	-1
1	1	2	605	0.47904	-1	-1
1	1	2	606	0.56647	-1	-1
1	1	2	607	0.56666	-1	-1
1	1	2	608	1.1275	-1	-1
1	1	2	609	0.44627	-1	-1
1	1	2	610	0.65501	-1	-1
1	1	2	611	0.47173	-1	-1
1	1	2	612	0.67892	-1	-1
1	1	2	613	0.63021	-1	-1
1	1	2	614	0.47957	-1	-1
1	1	2	615	0.46257	-1	-1
1	1	2	616	0.67881	-1	-1
1	1	2	617	0.47896	-1	-1
1	1	2	618	0.59879	-1	-1
1	1	2	619	0.49469	-1	-1
1	1	2	620	0.51105	-1	-1
1	1	2	621	0.54306	-1	-1
1	1	2	622	0.51886	-1	-1
1	1	2	623	0.54336	-1	-1
1	1	2	624	0.57507	-1	-1
1	1	2	625	0.45498	-1	-1
1	1	2	626	0.50287	-1	-1
1	1	2	627	0.54216	-1	-1
1	1	2	628	0.55142	-1	-1
1	1	2	629	0.61476	-1	-1
1	1	2	630	0.56657	-1	-1
1	1	2	631	0.43148	-1	-1
1	1	2	632	0.5025	-1	-1
1	1	2	633	0.41568	-1	-1
1	1	2	634	1.9181	-1	-1
1	1	2	635	0.67968	-1	-1
1	1	2	636	0.55883	-1	-1
1	1	2	637	0.4624	-1	-1
1	1	2	638	0.57482	-1	-1
1	1	2	639	0.43093	-1	-1
1	1	2	640	0.56729	-1	-1
1	1	2	641	0.63124	-1	-1
1	1	2	642	0.46274	-1	-1
1	1	2	643	0.58222	-1	-1
1	1	2	644	0.51093	-1	-1
1	1	2	645	0.64697	-1	-1
1	1	2	646	0.46306	-1	-1
1	1	2	647	0.5197	-1	-1
1	1	2	648	0.74212	-1	-1
1	1	2	649	0.52763	-1	-1
1	1	2	650	0.50206	-1	-1
1	1	2	651	0.51943	-1	-1
1	1	2	652	0.63037	-1	-1
1	1	2	653	0.78331	-1	-1
1	1	2	654	0.47866	-1	-1
1	1	2	655	0.48724	-1	-1
1	1	2	656	0.43901	-1	-1
1	1	2	657	0.80658	-1	-1
1	1	2	658	0.46276	-1	-1
1	1	2	659	0.51897	-1	-1
1	1	2	660	0.41573	-1	-1
1	1	2	661	0.53452	-1	-1
1	1	2	662	0.56729	-1	-1
1	1	2	663	0.86208	-1	-1
1	1	2	664	0.48724	-1	-1
1	1	2	665	0.42347	-1	-1
1	1	2	666	0.5581	-1	-1
1	1	2	667	0.48699	-1	-1
1	1	2	668	0.59884	-1	-1
1	1	2	669	0.48749	-1	-1
1	1	2	670	0.40657	-1	-1
1	1	2	671	0.5117	-1	-1
1	1	2	672	0.47078	-1	-1
1	1	2	673	0.41417	-1	-1
1	1	2	674	0.50289	-1	-1
1	1	2	675	0.88695	-1	-1
1	1	2	676	0.4474	-1	-1
1	1	2	677	0.47891	-1	-1
1	1	2	678	0.47914	-1	-1
1	1	2	679	0.48652	-1	-1
1	1	2	680	0.47157	-1	-1
1	1	2	681	0.47017	-1	-1
1	1	2	682	0.47119	-1	-1
1	1	2	683	0.45459	-1	-1
1	1	2	684	0.46366	-1	-1
1	1	2	685	0.42274	-1	-1
1	1	2	686	0.50251	-1	-1
1	1	2	687	0.80699	-1	-1
1	1	2	688	0.71079	-1	-1
1	1	2	689	0.5032	-1	-1
1	1	2	690	0.6945	-1	-1
1	1	2	691	0.66281	-1	-1
1	1	2	692	0.42367	-1	-1
1	1	2	693	0.58245	-1	-1
1	1	2	694	0.4548	-1	-1
1	1	2	695	0.47155	-1	-1
1	1	2	696	0.56697	-1	-1
1	1	2	697	0.47104	-1	-1
1	1	2	698	0.5985	-1	-1
1	1	2	699	0.35903	-1	-1
1	1	2	700	0.46251	-1	-1
1	1	2	701	0.51171	-1	-1
1	1	2	702	0.48643	-1	-1
1	1	2	703	0.55105	-1	-1
1	1	2	704	0.439	-1	-1
1	1	2	705	0.55049	-1	-1
1	1	2	706	0.36735	-1	-1
1	1	2	707	0.55892	-1	-1
1	1	2	708	0.65502	-1	-1
1	1	2	709	0.46231	-1	-1
1	1	2	710	0.42335	-1	-1
1	1	2	711	0.47929	-1	-1
1	1	2	712	0.44633	-1	-1
1	1	2	713	0.51946	-1	-1
1	1	2	714	0.671	-1	-1
1	1	2	715	0.40682	-1	-1
1	1	2	716	0.40641	-1	-1
1	1	2	717	0.39153	-1	-1
1	1	2	718	0.47906	-1	-1
1	1	2	719	0.72587	-1	-1
1	1	2	720	0.36727	-1	-1
1	1	2	721	0.58258	-1	-1
1	1	2	722	0.34351	-1	-1
1	1	2	723	0.5029	-1	-1
1	1	2	724	0.50257	-1	-1
1	1	2	725	0.43084	-1	-1
1	1	2	726	0.46359	-1	-1
1	1	2	727	0.43866	-1	-1
1	1	2	728	0.63841	-1	-1
1	1	2	729	0.39898	-1	-1
1	1	2	730	0.48735	-1	-1
1	1	2	731	0.45474	-1	-1
1	1	2	732	0.47925	-1	-1
1	1	2	733	0.49512	-1	-1
1	1	2	734	0.51843	-1	-1
1	1	2	735	0.50363	-1	-1
1	1	2	736	0.57439	-1	-1
1	1	2	737	0.3511	-1	-1
1	1	2	738	0.46233	-1	-1
1	1	2	739	0.67165	-1	-1
1	1	2	740	0.36661	-1	-1
1	1	2	741	0.41463	-1	-1
1	1	2	742	0.46345	-1	-1
1	1	2	743	0.45483	-1	-1
1	1	2	744	0.43075	-1	-1
1	1	2	745	0.49458	-1	-1
1	1	2	746	0.54389	-1	-1
1	1	2	747	0.58281	-1	-1
1	1	2	748	0.43889	-1	-1
1	1	2	749	0.51828	-1	-1
1	1	2	750	0.50372	-1	-1
1	1	2	751	0.53457	-1	-1
1	1	2	752	0.60629	-1	-1
1	1	2	753	0.41508	-1	-1
1	1	2	754	0.39964	-1	-1
1	1	2	755	0.431	-1	-1
1	1	2	756	0.47891	-1	-1
1	1	2	757	0.38286	-1	-1
1	1	2	758	0.50298	-1	-1
1	1	2	759	0.42237	-1	-1
1	1	2	760	0.40751	-1	-1
1	1	2	761	0.49502	-1	-1
1	1	2	762	0.43072	-1	-1
1	1	2	763	0.4789	-1	-1
1	1	2	764	0.40642	-1	-1
1	1	2	765	0.52744	-1	-1
1	1	2	766	0.52683	-1	-1
1	1	2	767	0.39885	-1	-1
1	1	2	768	0.51118	-1	-1
1	1	2	769	0.39907	-1	-1
1	1	2	770	0.50246	-1	-1
1	1	2	771	0.51948	-1	-1
1	1	2	772	0.47072	-1	-1
1	1	2	773	0.57464	-1	-1
1	1	2	774	0.57496	-1	-1
1	1	2	775	0.55871	-1	-1
1	1	2	776	0.45532	-1	-1
1	1	2	777	0.50287	-1	-1
1	1	2	778	0.48708	-1	-1
1	1	2	779	0.52712	-1	-1
1	1	2	780	0.45392	-1	-1
1	1	2	781	0.43896	-1	-1
1	1	2	782	0.47101	-1	-1
1	1	2	783	0.51953	-1	-1
1	1	2	784	0.65496	-1	-1
1	1	2	785	0.3671	-1	-1
1	1	2	786	0.49418	-1	-1
1	1	2	787	0.4549	-1	-1
1	1	2	788	0.51116	-1	-1
1	1	2	789	0.5827	-1	-1
1	1	2	790	0.52689	-1	-1
1	1	2	791	0.43934	-1	-1
1	1	2	792	0.39887	-1	-1
1	1	2	793	0.62347	-1	-1
1	1	2	794	0.45399	-1	-1
1	1	2	795	0.53529	-1	-1
1	1	2	796	0.4394	-1	-1
1	1	2	797	0.49434	-1	-1
1	1	2	798	0.51875	-1	-1
1	1	2	799	0.42331	-1	-1
1	1	2	800	0.42302	-1	-1
1	1	2	801	0.43071	-1	-1
1	1	2	802	0.46249	-1	-1
1	1	2	803	0.47114	-1	-1
1	1	2	804	0.45523	-1	-1
1	1	2	805	0.51892	-1	-1
1	1	2	806	0.4066	-1	-1
1	1	2	807	0.43939	-1	-1
1	1	2	808	0.45468	-1	-1
1	1	2	809	0.45534	-1	-1
1	1	2	810	0.50231	-1	-1
1	1	2	811	0.44703	-1	-1
1	1	2	812	0.51154	-1	-1
1	1	2	813	0.50264	-1	-1
1	1	2	814	0.83115	-1	-1
1	1	2	815	0.49405	-1	-1
1	1	2	816	0.52696	-1	-1
1	1	2	817	0.43117	-1	-1
1	1	2	818	0.49502	-1	-1
1	1	2	819	0.45462	-1	-1
1	1	2	820	0.51176	-1	-1
1	1	2	821	0.49492	-1	-1
1	1	2	822	0.43085	-1	-1
1	1	2	823	0.49478	-1	-1
1	1	2	824	0.59081	-1	-1
1	1	2	825	0.47941	-1	-1
1	1	2	826	0.39061	-1	-1
1	1	2	827	0.46254	-1	-1
1	1	2	828	0.53536	-1	-1
1	1	2	829	0.46264	-1	-1
1	1	2	830	0.55153	-1	-1
1	1	2	831	0.56624	-1	-1
1	1	2	832	0.43083	-1	-1
1	1	2	833	0.44722	-1	-1
1	1	2	834	0.51132	-1	-1
1	1	2	835	0.5102	-1	-1
1	1	2	836	0.47095	-1	-1
1	1	2	837	0.47105	-1	-1
1	1	2	838	0.41543	-1	-1
1	1	2	839	0.59809	-1	-1
1	1	2	840	0.54319	-1	-1
1	1	2	841	0.53506	-1	-1
1	1	2	842	0.47909	-1	-1
1	1	2	843	0.58269	-1	-1
1	1	2	844	0.43106	-1	-1
1	1	2	845	0.46346	-1	-1
1	1	2	846	0.4785	-1	-1
1	1	2	847	0.51117	-1	-1
1	1	2	848	0.48661	-1	-1
1	1	2	849	0.51117	-1	-1
1	1	2	850	0.49419	-1	-1
1	1	2	851	0.655	-1	-1
1	1	2	852	0.69573	-1	-1
1	1	2	853	0.4068	-1	-1
1	1	2	854	0.47083	-1	-1
1	1	2	855	0.52694	-1	-1
1	1	2	856	0.51831	-1	-1
1	1	2	857	0.47891	-1	-1
1	1	2	858	0.5353	-1	-1
1	1	2	859	0.46302	-1	-1
1	1	2	860	0.66332	-1	-1
1	1	2	861	0.51088	-1	-1
1	1	2	862	0.63019	-1	-1
1	1	2	863	0.4792	-1	-1
1	1	2	864	0.35141	-1	-1
1	1	2	865	0.95074	-1	-1
1	1	2	866	0.51093	-1	-1
1	1	2	867	0.35827	-1	-1
1	1	2	868	0.43892	-1	-1
1	1	2	869	0.45502	-1	-1
1	1	2	870	0.49577	-1	-1
1	1	2	871	0.43055	-1	-1
1	1	2	872	0.4546	-1	-1
1	1	2	873	0.43111	-1	-1
1	1	2	874	0.43909	-1	-1
1	1	2	875	0.41478	-1	-1
1	1	2	876	0.4945	-1	-1
1	1	2	877	0.43912	-1	-1
1	1	2	878	0.48693	-1	-1
1	1	2	879	0.43921	-1	-1
1	1	2	880	0.43106	-1	-1
1	1	2	881	0.40686	-1	-1
1	1	2	882	0.47061	-1	-1
1	1	2	883	0.61545	-1	-1
1	1	2	884	0.43048	-1	-1
1	1	2	885	0.40674	-1	-1
1	1	2	886	0.40726	-1	-1
1	1	2	887	0.49526	-1	-1
1	1	2	888	0.42285	-1	-1
1	1	2	889	0.49479	-1	-1
1	1	2	890	0.42266	-1	-1
1	1	2	891	0.4389	-1	-1
1	1	2	892	0.43111	-1	-1
1	1	2	893	0.43117	-1	-1
1	1	2	894	0.55851	-1	-1
1	1	2	895	0.43931	-1	-1
1	1	2	896	0.43871	-1	-1
1	1	2	897	0.39931	-1	-1
1	1	2	898	0.43023	-1	-1
1	1	2	899	0.40777	-1	-1
1	1	2	900	0.47067	-1	-1
1	1	2	901	0.47862	-1	-1
1	1	2	902	0.415	-1	-1
1	1	2	903	0.46328	-1	-1
1	1	2	904	0.40618	-1	-1
1	1	2	905	0.48752	-1	-1
1	1	2	906	0.47072	-1	-1
1	1	2	907	0.39873	-1	-1
1	1	2	908	0.45502	-1	-1
1	1	2	909	0.45523	-1	-1
1	1	2	910	0.47866	-1	-1
1	1	2	911	0.40661	-1	-1
1	1	2	912	0.59959	-1	-1
1	1	2	913	0.42304	-1	-1
1	1	2	914	0.67836	-1	-1
1	1	2	915	0.3666	-1	-1
1	1	2	916	0.47128	-1	-1
1	1	2	917	0.50281	-1	-1
1	1	2	918	0.43942	-1	-1
[truncated: 62,920 more rows]
